# Supplementary material for: Hydrogen sulfide generation and emission in urban sanitary sewer in China: what factor plays the critical role?
Source: Royal Society of Chemistry journal article supplement (doi:10.1039/c8ew00617b), 2019-01-01
Supplement: c8ew00617b1.pdf [file c8ew00617b1.pdf]

## Supporting materials

### **Hydrogen sulfide generation and emission in urban sanitary sewer in China: What factor plays the critical role?**

Zhiqiang Zuo<sup>1</sup>, Jian Chang<sup>4</sup>, Zhengsheng Lu<sup>1</sup>, Moran Wang<sup>1</sup>, Yucong Lin<sup>2</sup>, Min Zheng<sup>1,5</sup>, David Z. Zhu<sup>3</sup>, Tong Yu<sup>3</sup>, Xia Huang<sup>1</sup>, Yanchen Liu<sup>1,\*</sup>

<sup>1</sup> State Key Joint Laboratory of Environment Simulation and Pollution Control, School of Environment, Tsinghua University, Beijing 100084, China

<sup>2</sup> Center for Statistical Science and Department of Industrial Engineering, Tsinghua University, Beijing 100084, China.

<sup>3</sup> Dept. of Civil and Environmental Engineering, Univ. of Alberta, Edmonton, AB, Canada T6G 2W2

<sup>4</sup> Beijing Municipal Engineering Design and Research Institute, Beijing, 100082, China

<sup>5</sup> Advanced Water Management Centre, the University of Queensland, QLD, Australia

**\*Corresponding author**

Email: liuyc@mail.tsinghua.edu.cn

**Table S1.** T test for sulfide formation with wastewater quality

| Parameter    | Unit | Coefficient<br>estimation | Std. Error | Pr ( $>  t $ ) | VIF   |
|--------------|------|---------------------------|------------|----------------|-------|
| Intercept    |      | 5.399e-1                  | 1.822e-1   | 0.00323**      |       |
| COD          | mg/L | -1.10e-3                  | 3.1e-4     | 0.00049***     | 1.080 |
| Conductivity | us/m | 1.49e-4                   | 3.98e-5    | 0.00021***     | 1.815 |
| Velocity     | cm/s | -7.21e-3                  | 3.4e-3     | 0.03442*       | 1.828 |

0<'\*\*\*' <0.001<'\*\*' <0.01< '\*' <0.05
